# Supplementary material
Source: publisher site journal article supplement (https://spandidos-publications.com/6180/downloadSupplementary)

Figure S1. Association of low tidal volume ventilation and peak pressure in patients with one-lung ventilation undergoing surgery. SD, standard deviation; CI, confidence interval; df, degrees of freedom; IV, inverse variance.

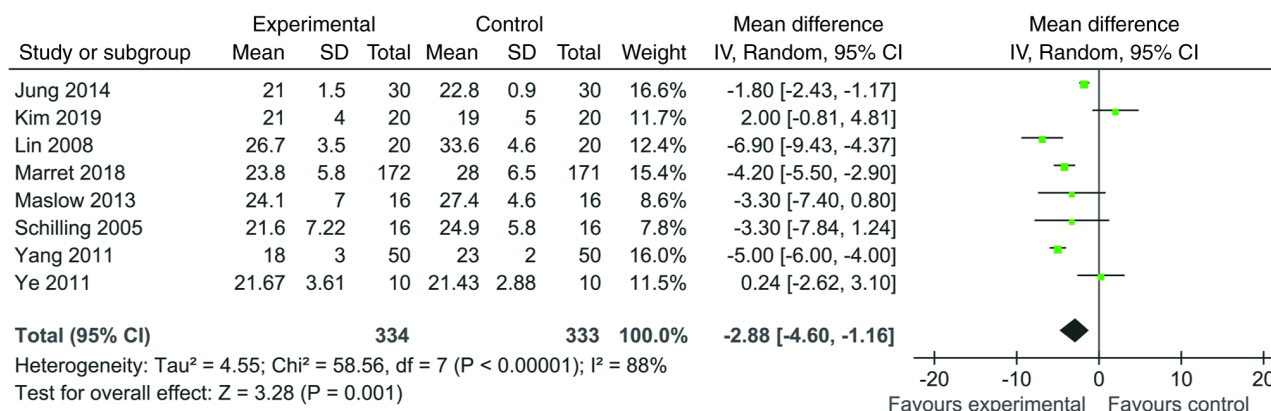

Figure S2. Association of low tidal volume ventilation and the risk of atelectasis in patients with one-lung ventilation undergoing surgery. M-H, Mantel-Haenszel; CI, confidence interval; df, degrees of freedom.

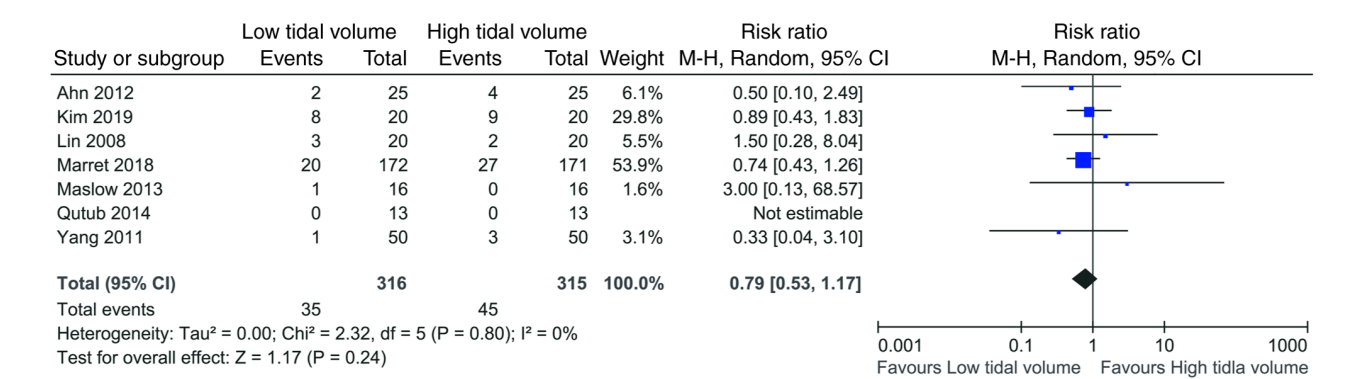

Supplement: Supplementary file 1 [file downloadSupplementary]
